# Supplementary material for: Development of a Modular Assay for Detailed Immunophenotyping of Peripheral Human Whole Blood Samples by Multicolor Flow Cytometry
Source: PubMed Central journal article supplement (PMC5000713; doi:10.3390/ijms17081316), 2016-08-11
Supplement: ijms-17-01316-s001.pdf [file ijms-17-01316-s001.pdf]

# Supplementary Materials: Development of a Modular Assay for Detailed Immunophenotyping of Peripheral Human Whole Blood Samples by Multicolor Flow Cytometry

Paul F. Rühle, Rainer Fietkau, Udo S. Gaipl and Benjamin Frey

Table S1. Details on applied antibodies.

| Specificity | Clone       | Fluorochrome | Amount per 100 $\mu$ L Blood | Vendor          |
|-------------|-------------|--------------|------------------------------|-----------------|
| CD1c        | L161        | APC          | 1.0                          | eBioscience     |
| CD3         | UCHT1       | KO           | 3.0                          | Beckman Coulter |
| CD3         | UCHT1       | V450         | 1.0                          | BD Biosciences  |
| CD3         | UCHT1       | FITC         | 3.0                          | BD Biosciences  |
| CD4         | RPA-T4      | PCC5.5       | 1.0                          | BD Biosciences  |
| CD5         | UCHT2       | PECy7        | 0.5                          | eBioscience     |
| CD8         | HIT8a       | FITC         | 4.0                          | BD Biosciences  |
| CD11c       | B-ly6       | V450         | 1.0                          | BD Biosciences  |
| CD14        | M5E2        | FITC         | 4.0                          | BD Biosciences  |
| CD16        | B73.1       | PE           | 2.5                          | BD Biosciences  |
| CD16        | B73.1       | FITC         | 2.5                          | BD Biosciences  |
| CD16        | 3G8         | KO           | 2.0                          | Beckman Coulter |
| CD19        | J3-119      | KO           | 1.0                          | Beckman Coulter |
| CD19        | HIB19       | FITC         | 2.0                          | BD Biosciences  |
| CD20        | 2H7         | FITC         | 4.0                          | BD Biosciences  |
| CD24        | ML5         | PCC5.5       | 2.5                          | BD Biosciences  |
| CD25        | M-A251      | BV421        | 2.5                          | BD Biosciences  |
| CD25        | M-A251      | PECy7        | 5.0                          | BD Biosciences  |
| CD25        | M-A251      | PE           | 4.0                          | BD Biosciences  |
| CD27        | M-T271      | V450         | 1.0                          | BD Biosciences  |
| CD34        | 563         | APC          | 5.0                          | BD Biosciences  |
| CD38        | HIT2        | APC          | 5.0                          | BD Biosciences  |
| CD45        | HI30        | PECy7        | 1.0                          | BD Biosciences  |
| CD45RA      | HI100       | PECy7        | 2.0                          | BD Biosciences  |
| CD56        | B159        | FITC         | 1.0                          | BD Biosciences  |
| CD56        | B159        | PCC5.5       | 4.0                          | BD Biosciences  |
| CD64        | 10.1        | V450         | 2.5                          | BD Biosciences  |
| CD66        | B1.1/CD66 * | FITC         | 2.0                          | BD Biosciences  |
| CD69        | FN50        | PEV770       | 2.0                          | Miltenyi Biotec |
| CD69        | FN50        | FITC         | 2.0                          | Miltenyi Biotec |
| CD80        | 2D10        | APC          | 2.0                          | Miltenyi Biotec |
| CD80        | L307.4      | APCH7        | 5.0                          | BD Biosciences  |
| CD83        | HB15e       | PECy7        | 2.5                          | eBioscience     |
| CD86        | IT2.2       | PCC5.5       | 5.0                          | BioLegend       |
| CD94        | REA113      | PEV770       | 2.0                          | Miltenyi Biotec |
| CD123       | 7G3         | PCC5.5       | 7.0                          | BD Biosciences  |
| CD127       | HIL-7R-M21  | FITC         | 20.0                         | BD Biosciences  |
| CD133/1     | AC133       | PE           | 5.0                          | Miltenyi Biotec |
| CD146       | P1H12       | FITC         | 2.5                          | BD Biosciences  |
| CD152       | BNI3        | APC          | 10.0                         | BD Biosciences  |

**Table S1.** *Cont.*

| <b>Specificity</b> | <b>Clone</b> | <b>Fluorochrome</b> | <b>Amount per 100 <math>\mu</math>L Blood</b> | <b>Vendor</b>   |
|--------------------|--------------|---------------------|-----------------------------------------------|-----------------|
| CD159a             | 131411       | APC                 | 10.0                                          | R&D Systems     |
| CD159c             | 134591       | A488                | 10.0                                          | R&D Systems     |
| CD183              | 1C6/CXCR3    | APC                 | 3.0                                           | BD Biosciences  |
| CD196              | 11A9         | PE                  | 4.0                                           | BD Biosciences  |
| CD197              | 150503       | PE                  | 5.0                                           | BD Biosciences  |
| CD274              | MIH1         | PE                  | 20.0                                          | BD Biosciences  |
| CD279              | MIH4         | APC                 | 10.0                                          | BD Biosciences  |
| CD314              | 149810       | APC                 | 2.0                                           | R&D Systems     |
| HLA-DR             | Immu-357     | KO                  | 2.0                                           | Beckman Coulter |
| TCRab              | T10B9.1A-31  | PE                  | 20.0                                          | BD Biosciences  |
| TCRgd              | 11F2         | FITC                | 10.0                                          | BD Biosciences  |

\* Instead of the B1.1/CD66 clone one might apply the G10F5 clone which specifically binds to CD66b isotype that exclusively is expressed on neutrophils and eosinophils.

**Table S2.** Gallios flow cytometer settings.

| <b>Laser</b> | <b>Power</b> | <b>Detector</b> | <b>Filter</b> | <b>Range</b> | <b>Voltage</b> | <b>Gain</b> |
|--------------|--------------|-----------------|---------------|--------------|----------------|-------------|
| 488 nm       | 22 mW        | FSC             | –             | –            | 300            | 5.0         |
|              |              | SSC             | –             | –            | 300            | 2.0         |
|              |              | FL1             | 525 BP 40     | 505–545      | 470            | 1           |
|              |              | FL2             | 575 BP 30     | 560–590      | 500            | 1           |
|              |              | FL3             | 620 BP 30     | 605–635      | 430            | 1           |
| 638 nm       | 25 mW        | FL4             | 695 BP 30     | 680–710      | 630            | 1           |
|              |              | FL5             | 755 LP        | >755         | 600            | 1           |
|              |              | FL6             | 660 BP 20     | 650–670      | 650            | 1           |
| 405 nm       | 40 mW        | FL7             | 725 BP 20     | 715–735      | –              | –           |
|              |              | FL8             | 755 LP        | >755         | 600            | 1           |
|              |              | FL9             | 450 BP 50     | 425–475      | 470            | 1           |
|              |              | FL10            | 550 BP 40     | 530–570      | 400            | 1           |

**Table S3.** Preparation of antibody mix for all panels.

| Antigen             | Fluorochr. | $\mu\text{L}$ | Antigen                    | Fluorochr. | $\mu\text{L}$ | Antigen                  | Fluorochr. | $\mu\text{L}$ |
|---------------------|------------|---------------|----------------------------|------------|---------------|--------------------------|------------|---------------|
| P01: T cells        |            |               | P05: T & B cell activation |            |               | P09: Granulocytes        |            |               |
| PBS                 | –          | 22.0          | PBS                        | –          | 5.0           | PBS                      | –          | 33.5          |
| CD38                | APC        | 5.0           | CD279                      | APC        | 10.0          | CD64                     | V450       | 2.5           |
| CD197               | PE         | 5.0           | CD80                       | APCH7      | 5.0           | CD16                     | KO         | 2.0           |
| CD8                 | FITC       | 4.0           | CD86                       | PCC5.5     | 5.0           | CD66                     | FITC       | 2.0           |
| CD45RA              | PECy7      | 2.0           | CD25                       | PE         | 4.0           | P10: HSC, CEC & EPC      |            |               |
| CD3                 | V450       | 1.0           | CD20                       | FITC       | 4.0           | PBS                      | –          | 16.5          |
| CD4                 | PCC5.5     | 1.0           | CD19                       | FITC       | 2.0           | PI                       | PI         | 10.0          |
| P02: TH & TREGs     |            |               | HLA-DR                     | KO         | 2.0           | CD133/1                  | PE         | 5.0           |
| PBS                 | –          | 6.0           | CD69                       | PEV770     | 2.0           | CD34                     | APC        | 5.0           |
| CD127               | FITC       | 20.0          | CD3                        | V450       | 1.0           | CD146                    | FITC       | 2.5           |
| CD25                | PECy7      | 5.0           | P06: NK cells              |            |               | CD45                     | PECy7      | 1.0           |
| CD196               | PE         | 4.0           | PBS                        | –          | 24.0          | P11: DCs & basophils     |            |               |
| CD183               | APC        | 3.0           | CD56                       | PCC5.5     | 4.0           | CD274                    | PE         | 20.0          |
| CD3                 | V450       | 1.0           | CD3                        | KO         | 3.0           | PI                       | PI         | 10.0          |
| CD4                 | PCC5.5     | 1.0           | CD16                       | PE         | 2.5           | CD123                    | PCC5.5     | 7.0           |
| P03: TCR types      |            |               | CD25                       | BV421      | 2.5           | CD14                     | FITC       | 4.0           |
| PBS                 | –          | –             | CD314                      | APC        | 2.0           | CD20                     | FITC       | 4.0           |
| TCR $\alpha/\beta$  | PE         | 20.0          | CD69                       | FITC       | 2.0           | CD3                      | FITC       | 3.0           |
| TCR $\gamma/\delta$ | FITC       | 10.0          | P07: NK cells II           |            |               | CD16                     | FITC       | 2.5           |
| CD152               | APC        | 10.0          | PBS                        | –          | 13.5          | CD83                     | PECy7      | 2.5           |
| CD3                 | V450       | 1.0           | CD159a                     | APC        | 10.0          | CD19                     | FITC       | 2.0           |
| P04: B cells        |            |               | CD159c                     | A488       | 5.0           | HLA-DR                   | KO         | 2.0           |
| PBS                 | –          | 24.0          | CD56                       | PCC5.5     | 4.0           | CD56                     | FITC       | 1.0           |
| CD38                | APC        | 5.0           | CD3                        | KO         | 3.0           | CD1c                     | APC        | 1.0           |
| CD20                | FITC       | 4.0           | CD16                       | PE         | 2.5           | CD11c                    | V450       | 1.0           |
| CD24                | PCC5.5     | 2.5           | CD94                       | PEV770     | 2.0           | P12: Absolute cell count |            |               |
| CD1d                | PE         | 2.0           | P08: Monocytes             |            |               | PBS                      | –          | 7.5           |
| CD27                | V450       | 1.0           | PBS                        | –          | 16.0          | CD56                     | PCC5.5     | 4.0           |
| CD19                | KO         | 1.0           | CD14                       | FITC       | 10.0          | CD20                     | FITC       | 4.0           |
| CD5                 | PECy7      | 0.5           | CD86                       | PCC5.5     | 5.0           | CD16                     | PE         | 2.5           |
|                     |            |               | CD16                       | PE         | 2.5           | CD19                     | FITC       | 2.0           |
|                     |            |               | CD64                       | V450       | 2.5           | CD3                      | V450       | 1.0           |
|                     |            |               | HLA-DR                     | KO         | 2.0           | CD45                     | PECy7      | 1.0           |
|                     |            |               | CD80                       | APC        | 2.0           |                          |            |               |

All depicted antibody amounts are related to the staining of 100  $\mu\text{L}$  of whole blood.

**Table S4.** Solutions required for the lysis of erythrocytes and fixation of leukocytes.

|                                                             |
|-------------------------------------------------------------|
| <b>Solution TQ-A: Red Blood Cell Lysis</b>                  |
| 0.12% formic acid in ddH <sub>2</sub> O                     |
| <b>Solution TQ-B: Leukocyte Re-Buffering</b>                |
| 6.0 g/L sodium carbonate (Na <sub>2</sub> CO <sub>3</sub> ) |
| 14.5 g/L sodium chloride (NaCl)                             |
| 31.1 g/L sodium sulfate (Na <sub>2</sub> SO <sub>4</sub> )  |
| Fill up with ddH <sub>2</sub> O                             |
| <b>Solution TQ-C: Leukocyte Fixation</b>                    |
| 1% Paraformaldehyde in PBS (pH 7.4)                         |
